# Supplementary material
Source: PubMed Central journal article supplement (PMC2258788)

# Golden\_supplemental materials

## A Multiple alignment of Sizin1 with MA family genes

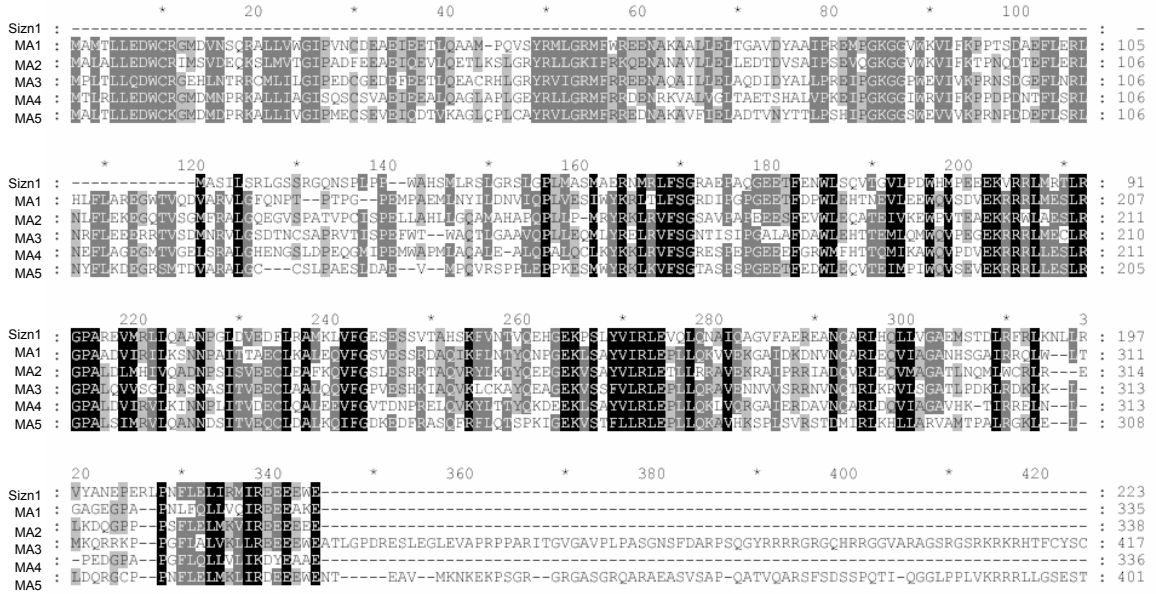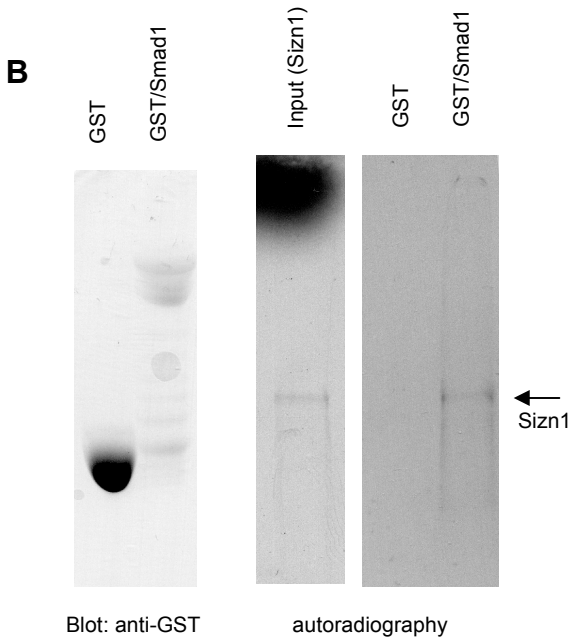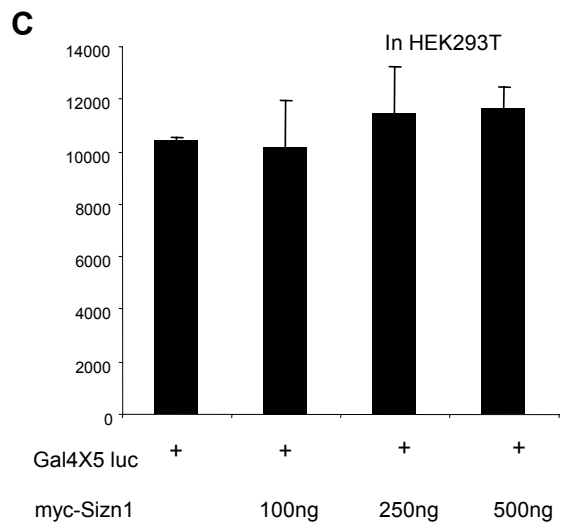

# Golden\_supplemental materials

**D**

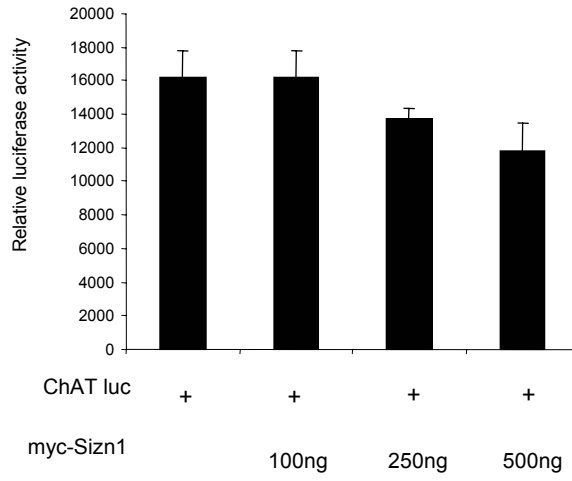

**E**

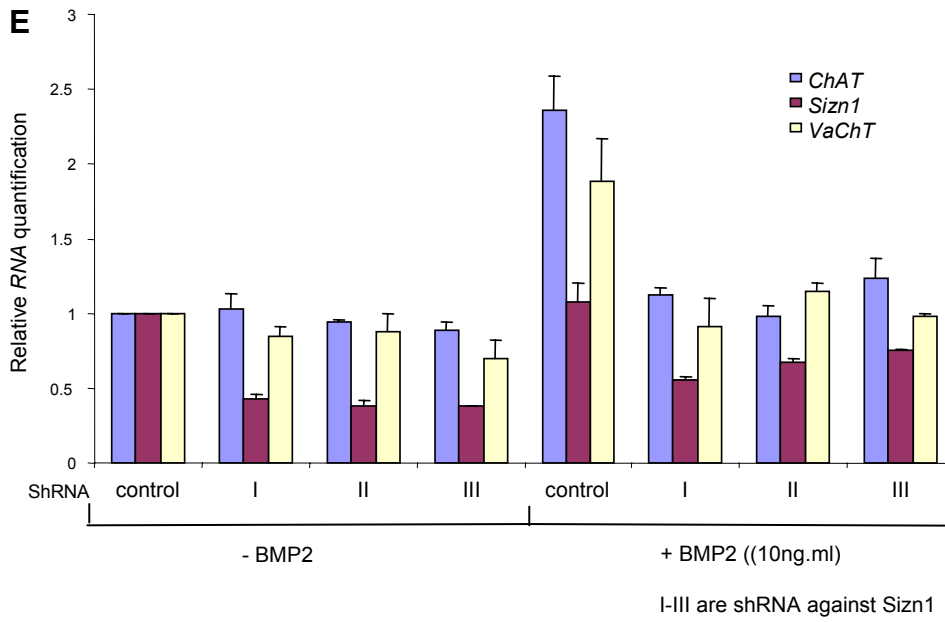

Supplement: molcellb_28_5_1565__1.pdf [file molcellb_28_5_1565__1.pdf]
